# Supplementary material
Source: PubMed Central journal article supplement (PMC2736875)
Supplement: NIHMS121575-supplement-1.pdf [file NIHMS121575-supplement-1.pdf]

## Supplementary Information Titles

Please list each supplementary item and its title or caption, in the order shown below.

**Note that we do NOT copy edit or otherwise change supplementary information, and minor (nonfactual) errors in these documents cannot be corrected after publication.**

Please submit document(s) exactly as you want them to appear, with all text, images, legends and references in the desired order, and check carefully for errors.

**Journal:** Nature Medicine

|                       |                                                                                                             |
|-----------------------|-------------------------------------------------------------------------------------------------------------|
| Article Title:        | Deficiency and pharmacological stabilization of mast cells reduce diet-induced obesity and diabetes in mice |
| Corresponding Author: | Guo-Ping Shi                                                                                                |

| Supplementary Item & Number<br>(add rows as necessary) | Title or Caption                                                                                           |
|--------------------------------------------------------|------------------------------------------------------------------------------------------------------------|
| Supplementary Figure 1                                 | Mast cell deficiency and stabilization reduced diet-induced obesity and diabetes in mice.                  |
| Supplementary Table 1                                  | Energy expenditure analysis in <i>Kit<sup>W<sup>-sh</sup>/W<sup>-sh</sup></sup></i> and DSCG-treated mice. |
| Supplementary Table 2                                  | Serum and adipose tissue cytokine, chemokine, adipokine, and protease levels (mean ± SEM).                 |
| Supplementary Table 3                                  | Clinical and biological parameters of patients used for serum tryptase ELISA.                              |
| Supplementary Table 4                                  | Clinical and biological parameters for patients used for immunohistology analysis.                         |
