# Supplementary material
Source: PubMed Central journal article supplement (PMC2736875)
Supplement: NIHMS121575-supplement-2.pdf [file NIHMS121575-supplement-2.pdf]

# Deficiency and pharmacological stabilization of mast cells reduce diet-induced obesity and diabetes in mice

Jian Liu, Adeline Divoux, Jiusong Sun, Jie Zhang, Karine Clément, Jonathan N. Glickman, Galina K. Sukhova, Paul J. Wolters, Juan Du, Cem Z. Gorgun, Alessandro Doria, Peter Libby, Richard S. Blumberg, Barbara B. Kahn, Gokhan S. Hotamisligil, Guo-Ping Shi

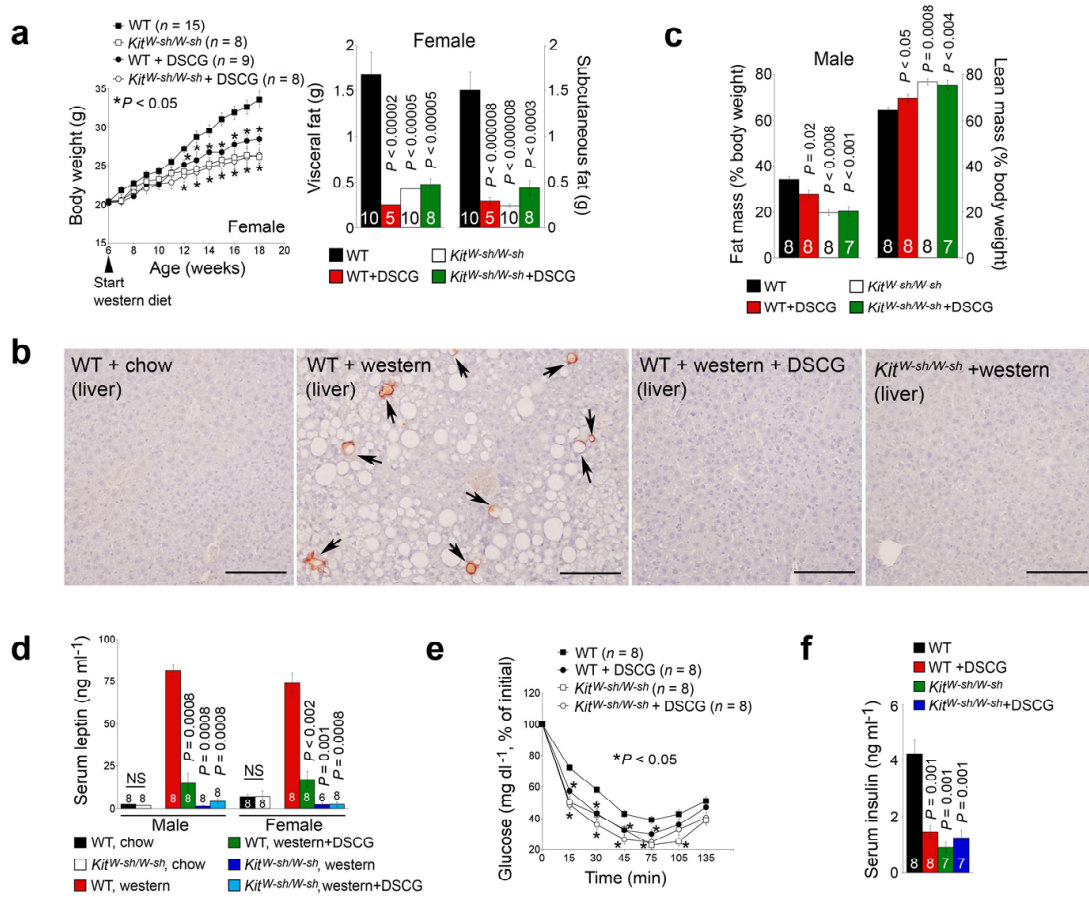

**Supplementary Figure 1.** Mast cell deficiency and stabilization reduced diet-induced obesity and diabetes in mice. **a.** Body weight gain (left) and visceral and subcutaneous fat weight (right) of female WT and *Kit*<sup>W-sh/W-sh</sup> mice and those receiving DSCG (all in C57BL/6 background). **b.** CD117 immunostaining for mast cells in liver paraffin sections from different mice as indicated. Arrows indicate CD117<sup>+</sup> mast cells. Scale bar: 100  $\mu$ m. Only Western diet-fed WT mice developed steatotic livers with abundant mast cell accumulation. Western diet-fed *Kit*<sup>W-sh/W-sh</sup> mice or WT mice receiving DSCG had normal liver histology similar to that in chow diet-fed WT mice. **c.** Fat and lean mass (% of body weight) in male WT and *Kit*<sup>W-sh/W-sh</sup> mice treated with or without DSCG. **d.** Serum leptin levels in male and female mice with indicated treatments. Insulin tolerance test (**e**) and serum insulin levels (**f**) in male WT and *Kit*<sup>W-sh/W-sh</sup> mice that consumed a Western diet for 12 weeks with and without DSCG treatments.  $P < 0.05$  was considered statistically significant; non-parametric Mann-Whitney test. NS: no significant difference.

**Supplementary Table 1:** Energy expenditure analysis in *Kit<sup>W-sh/W-sh</sup>* and DSCG-treated mice.

| <b>Parameters</b>                               | <b>WT<br/>(n = 6)<br/>(mean ± SEM)</b> | <b><i>Kit<sup>W-sh/W-sh</sup></i><br/>(n = 8)<br/>(mean ± SEM)</b> | <b>P<br/>Value*</b> | <b>WT + DGSC<br/>(n = 8)<br/>(mean ± SEM)</b> | <b>P<br/>Value*</b> |
|-------------------------------------------------|----------------------------------------|--------------------------------------------------------------------|---------------------|-----------------------------------------------|---------------------|
| Food consumption<br>(gram per 24 hours)         | 3.17 ± 0.08                            | 3.83 ± 0.26                                                        | 0.03                | 3.25 ± 0.28                                   | 0.87                |
| Water consumption<br>(ml per 24 hours)          | 7.03 ± 0.28                            | 6.38 ± 0.57                                                        | 0.30                | 10.75 ± 0.62                                  | 0.02                |
| Fecal output<br>(gram per 24 hours)             | 1.53 ± 0.16                            | 1.45 ± 0.14                                                        | 0.77                | 1.56 ± 0.23                                   | 0.89                |
| Urine volume<br>(ml per 24 hours)               | 1.40 ± 0.10                            | 1.65 ± 0.16                                                        | 0.75                | 1.40 ± 0.17                                   | 0.52                |
| O <sub>2</sub> consumption<br>(ml per kg per h) | 2620.31 ± 27.65                        | 2994.16 ± 67.79                                                    | 0.002               | 2867.29 ± 57.65                               | 0.005               |
| CO <sub>2</sub> production<br>(ml per kg per h) | 2129.04 ± 54.48                        | 2619.41 ± 100.18                                                   | 0.01                | 2534.96 ± 94.70                               | 0.01                |

\*Compared with WT mice, non-parametric Mann Whitney test.  $P < 0.05$  was considered significant.

**Supplementary Table 2.** Serum and adipose tissue cytokine, chemokine, adipokine, and protease levels (mean  $\pm$  SEM).

| Serum                                    | IL-6<br>(pg mL <sup>-1</sup> ) | TNF- $\alpha$<br>(pg mL <sup>-1</sup> ) | IFN- $\gamma$<br>(pg mL <sup>-1</sup> ) | MCP-1<br>(pg mL <sup>-1</sup> ) | Eotaxin<br>(pg mL <sup>-1</sup> ) | RANTES<br>(pg mL <sup>-1</sup> ) | Adiponectin<br>(ng mL <sup>-1</sup> ) | MMP-9<br>(pg mL <sup>-1</sup> ) | Cathepsin L<br>(ng mL <sup>-1</sup> ) |
|------------------------------------------|--------------------------------|-----------------------------------------|-----------------------------------------|---------------------------------|-----------------------------------|----------------------------------|---------------------------------------|---------------------------------|---------------------------------------|
| Males                                    |                                |                                         |                                         |                                 |                                   |                                  |                                       |                                 |                                       |
| Wt +Chow                                 | 32.5 $\pm$ 7.5                 | 54.1 $\pm$ 5.8                          | 1328.4 $\pm$ 205.2                      | 164.5 $\pm$ 18.4                | 419.0 $\pm$ 30.9                  | 7.2 $\pm$ 2.6                    | 6.7 $\pm$ 0.7                         | 70.5 $\pm$ 0.3                  | 4.6 $\pm$ 0.6                         |
| <i>Kit</i> <sup>W-sh/W-sh</sup> +Chow    | 30.9 $\pm$ 3.8                 | 51.9 $\pm$ 6.9                          | 1572.1 $\pm$ 87.2                       | 161.6 $\pm$ 19.8                | 680.7 $\pm$ 63.4***               | 25.1 $\pm$ 6.1**                 | 6.3 $\pm$ 0.5                         | 62.6 $\pm$ 1.1***               | 5.7 $\pm$ 0.7                         |
| Wt +Western                              | 74.4 $\pm$ 9.4                 | 146.3 $\pm$ 15.7                        | 1714.5 $\pm$ 123.7                      | 459.2 $\pm$ 24.3                | 477.6 $\pm$ 26.0                  | 8.9 $\pm$ 1.9                    | 8.2 $\pm$ 0.9                         | 71.4 $\pm$ 0.2                  | 5.4 $\pm$ 0.7                         |
| <i>Kit</i> <sup>W-sh/W-sh</sup> +Western | 41.6 $\pm$ 8.6                 | 43.4 $\pm$ 24.9**                       | 1467.2 $\pm$ 33.4*                      | 115.2 $\pm$ 14.8***             | 630.5 $\pm$ 61.0                  | 6.1 $\pm$ 1.3                    | 6.3 $\pm$ 0.5                         | 64.5 $\pm$ 1.4***               | 5.6 $\pm$ 0.9                         |
| Wt +DSCG+Western                         | 26.7 $\pm$ 7.7**               | 129.4 $\pm$ 20.9                        | 1403.9 $\pm$ 180.9**                    | 285.5 $\pm$ 39.6**              | 571.7 $\pm$ 38.2                  | 6.1 $\pm$ 1.6                    | 9.0 $\pm$ 0.6                         | 70.8 $\pm$ 0.2*                 | 4.4 $\pm$ 0.7                         |
| Females                                  |                                |                                         |                                         |                                 |                                   |                                  |                                       |                                 |                                       |
| Wt +Chow                                 | 18.9 $\pm$ 4.0                 | 44.0 $\pm$ 8.0                          | 900.2 $\pm$ 68.0                        | 170.4 $\pm$ 11.9                | 560.3 $\pm$ 47.0                  | 21.9 $\pm$ 9.3                   | 9.1 $\pm$ 0.7                         | 69.1 $\pm$ 3.9                  | 8.0 $\pm$ 0.4                         |
| <i>Kit</i> <sup>W-sh/W-sh</sup> +Chow    | 30.4 $\pm$ 9.1                 | 41.5 $\pm$ 9.3                          | 950.1 $\pm$ 73.9                        | 184.2 $\pm$ 16.8                | 531.2 $\pm$ 36.0                  | 23.4 $\pm$ 6.3                   | 7.4 $\pm$ 0.8                         | 70.0 $\pm$ 4.5                  | 8.3 $\pm$ 0.5                         |
| Wt +Western                              | 28.6 $\pm$ 8.3                 | 91.9 $\pm$ 16.8                         | 1502.9 $\pm$ 213.                       | 648.6 $\pm$ 73.9                | 549.1 $\pm$ 33.0                  | 16.7 $\pm$ 6.5                   | 9.0 $\pm$ 0.6                         | 71.5 $\pm$ 0.2                  | 9.1 $\pm$ 0.5                         |
| <i>Kit</i> <sup>W-sh/W-sh</sup> +Western | 27.9 $\pm$ 7.3                 | 30.6 $\pm$ 7.1***                       | 994.3 $\pm$ 120.7                       | 343.7 $\pm$ 44.4***             | 491.3 $\pm$ 27.0                  | 17.1 $\pm$ 4.6                   | 6.3 $\pm$ 0.5***                      | 65.8 $\pm$ 4.9                  | 8.2 $\pm$ 0.5                         |
| Wt +DSCG+Western                         | 31.7 $\pm$ 4.9                 | 91.5 $\pm$ 16.0                         | 1408.9 $\pm$ 131.5                      | 299.6 $\pm$ 38.7***             | 564.5 $\pm$ 47.0                  | 33.3 $\pm$ 3.4                   | 8.5 $\pm$ 0.7                         | 71.0 $\pm$ 0.2                  | 9.5 $\pm$ 0.6                         |
| WAT                                      |                                |                                         |                                         |                                 |                                   |                                  |                                       |                                 |                                       |
|                                          | IL-6<br>(pg mg <sup>-1</sup> ) | TNF- $\alpha$<br>(pg mg <sup>-1</sup> ) | IFN- $\gamma$<br>(pg mg <sup>-1</sup> ) | MCP-1<br>(pg mg <sup>-1</sup> ) | Eotaxin<br>(pg mg <sup>-1</sup> ) | RANTES<br>(pg mg <sup>-1</sup> ) | Adiponectin<br>(ng mg <sup>-1</sup> ) | MMP-9<br>(pg mg <sup>-1</sup> ) | Cathepsin L<br>(ng mg <sup>-1</sup> ) |
| Males                                    |                                |                                         |                                         |                                 |                                   |                                  |                                       |                                 |                                       |
| Wt +Chow                                 | 21.0 $\pm$ 2.7                 | 198.6 $\pm$ 12.1                        | 196.0 $\pm$ 32.7                        | 22.0 $\pm$ 6.8                  | 9.0 $\pm$ 4.0                     | 22.1 $\pm$ 2.7                   | 379.2 $\pm$ 37.0                      | 42.4 $\pm$ 4.1                  | 9.0 $\pm$ 0.5                         |
| <i>Kit</i> <sup>W-sh/W-sh</sup> +Chow    | 22.5 $\pm$ 1.5                 | 225.1 $\pm$ 18.8                        | 204.5 $\pm$ 25.3                        | 32.4 $\pm$ 6.1                  | 10.4 $\pm$ 3.5                    | 8.6 $\pm$ 3.1**                  | 357.7 $\pm$ 31.0                      | 40.1 $\pm$ 2.9                  | 9.7 $\pm$ 0.7                         |
| Wt +Western                              | 28.7 $\pm$ 2.8                 | 187.6 $\pm$ 12.5                        | 212.5 $\pm$ 29.7                        | 115.4 $\pm$ 18.2                | 5.8 $\pm$ 2.2                     | 15.7 $\pm$ 4.9                   | 373.1 $\pm$ 23.0                      | 35.4 $\pm$ 2.2                  | 8.8 $\pm$ 0.4                         |
| <i>Kit</i> <sup>W-sh/W-sh</sup> +Western | 20.9 $\pm$ 1.8*                | 124.5 $\pm$ 14.4**                      | 192.5 $\pm$ 18.2                        | 41.7 $\pm$ 12.2**               | 6.0 $\pm$ 3.4                     | 20.2 $\pm$ 3.7                   | 426.5 $\pm$ 46.0                      | 41.4 $\pm$ 5.1                  | 9.1 $\pm$ 0.5                         |
| Wt +DSCG+Western                         | 30.8 $\pm$ 5.2                 | 231.2 $\pm$ 13.3                        | 245.0 $\pm$ 9.5                         | 57.4 $\pm$ 7.7**                | 16.4 $\pm$ 3.2**                  | 26.4 $\pm$ 3.2                   | 266.1 $\pm$ 27.0*                     | 41.4 $\pm$ 3.4                  | 8.8 $\pm$ 0.5                         |

\* $P < 0.04$ ; \*\* $P < 0.02$ ; \*\*\* $P < 0.005$ . Non-parametric Mann-Whitney test to compare the corresponding WT groups.  $P < 0.05$  was considered significant.

**Supplementary Table 3.** Clinical and biological parameters of patients used for serum tryptase ELISA.

| Parameter                                             | Obese subject<br>(average [range]) | Lean subject<br>(average [range]) | P value <sup>†</sup> |
|-------------------------------------------------------|------------------------------------|-----------------------------------|----------------------|
| Patient number                                        | 80                                 | 32                                | N/A                  |
| Age (year)                                            | 37.3 [20.0~66.0]                   | 41.4 [20.0~62.0]                  | 0.11                 |
| Body mass index (BMI, kg per mm <sup>2</sup> )        | 48.5 [32.0~85.3]                   | 22.9 [19.9~25.6]                  | <0.01                |
| Sex (female to male)                                  | 69/11                              | 22/10                             | 0.45                 |
| Fasting glucose (mM)                                  | 5.1 [3.7~7.4]                      | 4.5 [3.4~5.3]                     | <0.01                |
| Fasting insulin ( $\mu\text{U mL}^{-1}$ )             | 15.4 [3.9~68.3]                    | 3.6 [0.4~7.9]                     | <0.01                |
| Homeostasis Model Assessment (HOMA)                   | 3.5 [0.8~15.3]                     | 0.7 [0.1~0.8]                     | <0.01                |
| Quantitative insulin-sensitivity check index (QUICKI) | 0.3 [0.3~0.4]                      | 0.4 [0.4~0.7]                     | <0.01                |
| Total cholesterol (mmol)                              | 4.8 [2.8~7.1]                      | 4.9 [3.1~7.8]                     | 0.67                 |
| High density lipoprotein (mmol)                       | 1.4 [0.6~2.2]                      | 1.6 [0.8~2.6]                     | 0.03                 |
| Triglyceride (mmol)                                   | 1.2 [0.4~3.7]                      | 1.0 [0.5~2.2]                     | 0.06                 |
| Tryptase ( $\text{ng mL}^{-1}$ )                      | 13.1 [1.0~73.0]                    | 7.7 [0.0~23.3]                    | 0.01                 |

<sup>†</sup>Comparison between obese and lean subjects. *Chi* square test was used for qualitative traits and unpaired *t*-test for quantitative traits.  $P < 0.05$  was considered statistically significant.

**Supplementary Table 4.** Clinical and biological parameters for patients used for immunohistology analysis.

| Parameter                                             | Obese subject<br>(average [range]) | Lean subject<br>(average [range]) | P value <sup>†</sup> |
|-------------------------------------------------------|------------------------------------|-----------------------------------|----------------------|
| <b>General measurement</b>                            |                                    |                                   |                      |
| Patient number                                        | 12                                 | 10                                | N/A                  |
| Sex (female to male)                                  | 6/6                                | 10/0                              | 0.002                |
| Age (year)                                            | 47.8 [20~63]                       | 35.2 [30~42]                      | 0.004                |
| Body mass index (BMI, kg per mm <sup>2</sup> )        | 49.9 [36.0~62.1]                   | 23.7 [21.9~26.2]                  | <0.0001              |
| <b>Glucose homeostasis</b>                            |                                    |                                   |                      |
| Glucose (mmol L <sup>-1</sup> )                       | 6.4 [4.2~10.3]                     | 4.8 [3.7~6.3]                     | 0.11                 |
| Insulin (μU mL <sup>-1</sup> )                        | 22.0 [4.7~84.2]                    | 7.2 [4.0~13.0]                    | <0.03                |
| Homeostasis Model Assessment (HOMA)                   | 7.3 [1.3~29.3]                     | 1.7 [0.7~3.6]                     | 0.38                 |
| Quantitative insulin-sensitivity check index (QUICKI) | 0.3 [0.2~0.4]                      | 0.4 [0.3~0.4]                     | <0.03                |
| <b>Type 2 diabetes</b>                                |                                    |                                   |                      |
| Glycemia (>7 mmol L <sup>-1</sup> or treatment)       | <i>n</i> = 5                       | <i>n</i> = 0                      | 0.007                |

<sup>†</sup>Comparison between obese and lean subjects. *Chi* square test was used for qualitative traits and Mann-Whitney *U* test for quantitative traits. *P* < 0.05 was considered statistically significant.
